# Supplementary material for: Non-Canonical Activation of the Epidermal Growth Factor Receptor by Carbon Nanoparticles
Source: Nanomaterials (Basel). 2018 Apr 23;8(4):267. doi: 10.3390/nano8040267 (PMC5923597; doi:10.3390/nano8040267)
Supplement: Supplementary file 1 [file nanomaterials-08-00267-s001.pdf]

## Supplementary Materials

### Non-canonical activation of the epidermal growth factor receptor by carbon nanoparticles

Daniel Stöckmann, Tim Spannbrucker, Niloofar Ale-Agha, Philipp Jakobs, Christine Goy, Nadine Dyballa-Rukes, Tamara Hornstein, Alexander Kümper, Annette Kraegeloh, Judith Haendeler, Klaus Unfried

Physical analysis of carbon particle suspensions (CP=carbon particles; CNP carbon nanoparticles)

Method: Suspensions of particles in PBS [1 mg/ml] were prepared by ultrasound desintegration. Suspensions were analyzed by transmission electron microscopy (JEM-2100 LaB6, JEOL, Tokyo, Japan) and dynamic light scattering (Zetasizer, Malvern Instruments, Malvern, UK). Analyses were performed in triplicate. Results of the analyses performed for CNP have been published earlier.(Kroker *et al.*, 2015)

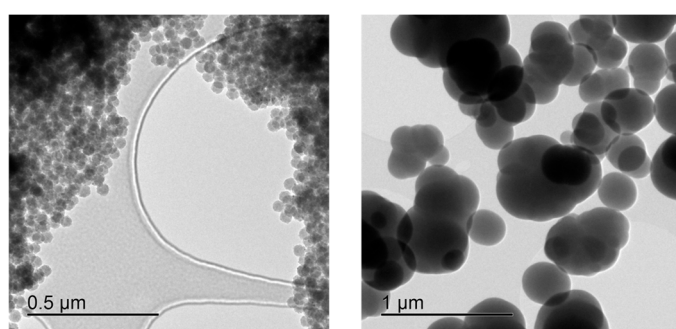

Figure S1. Transmission electron micrograph of CP after drying a particle suspension (H<sub>2</sub>O) on a holey carbon film.

Table S1: Physical characteristics of CNP suspension in PBS.

|     | <b>zeta potential</b><br>[mV] | <b>mobility</b><br>[μmcm/Vs] | <b>conductivity</b><br>[mS/cm] | <b>size [nm]</b><br>peak1<br>[%] | <b>size [nm]</b><br>peak2<br>[%] | <b>size [nm] peak3</b><br>[%] |
|-----|-------------------------------|------------------------------|--------------------------------|----------------------------------|----------------------------------|-------------------------------|
| CP  | -16.0                         | -1.257                       | 15.63                          | 359 (±22)<br>100                 | -                                | -                             |
| CNP | -22.4                         | -1.755                       | 16.56                          | 887 (±197)<br>88.8               | 118<br>(±126)<br>10.5            | 1798 (±3114.8)<br>0.7         |

Kroker M, Sydlik U, Autengruber A, Cavelius C, Weighardt H, et al. 2015. Preventing carbon nanoparticle-induced lung inflammation reduces antigen-specific sensitization and subsequent allergic reactions in a mouse model. Part Fibre Toxicol 12:20.
